# Supplementary material for: Comparative study on efficiency of surface enhanced coal fly ash and raw coal fly ash for the removal of hazardous dyes in wastewater: optimization through response surface methodology
Source: Royal Society of Chemistry journal article supplement (doi:10.1039/d4ra04075a), 2024-01-01
Supplement: d4ra04075a1.pdf [file d4ra04075a1.pdf]

*Supplemental Data*

**Comparative study on Efficiency of Surface Enhanced Coal Fly Ash and Raw Coal Fly Ash for the Removal of Hazardous Dyes in Wastewater: Optimization through Response Surface Methodology**

Haris Nadeem<sup>1</sup>, Faisal Jamil<sup>1</sup>, Muhammad Adnan Iqbal<sup>1,2,\*</sup>, Tan Wen Nee<sup>3</sup>, Muhammad Kashif<sup>4</sup>, Ahmad Hamdy Ibrahim<sup>5</sup>, Sawsan S. Al-Rawi<sup>6</sup>, Sami Ullah Zia<sup>1</sup>, Umar Sohail Shoukat<sup>1</sup>, Rimsha Kanwal<sup>1</sup>, Farhan Ahmad<sup>1</sup>, Sabha Khalid<sup>1</sup>, Muhammad Tjammal Rehman<sup>7</sup>

<sup>1</sup>Department of Chemistry, University of Agriculture Faisalabad, 38000, Pakistan

<sup>2</sup>Synthetic Organometallic and Coordination Chemistry Laboratory, Department of Chemistry, University of Agriculture Faisalabad, 38000, Pakistan

<sup>3</sup>Chemistry Section, School of Distance Education, Universiti Sains Malaysia, 11800 Penang, Malaysia

<sup>4</sup>Department of Mathematics and Statistics, University of Agriculture, Faisalabad 38000, Pakistan

<sup>5</sup>Pharmacy Department, Faculty of Pharmacy, Tishk International University, 100mt. St, near Baz intersection, Erbil, KRG, Iraq

<sup>6</sup>Biology Education Department, Faculty of Education, Tishk International University 100mt. St, near Baz intersection, Erbil, KRG/ Iraq

<sup>7</sup>Department of Biochemistry, University of Agriculture Faisalabad, Faisalabad 38000, Pakistan

\*Corresponding author: [adnan.iqbal@uaf.edu.pk](mailto:adnan.iqbal@uaf.edu.pk)

## Section S1: Zeta sizer and potential

This technique was used to investigate the stability of the particles by calculating their static charge and particle sizes in the colloidal solution. The more the static charge (either positive or negative), the less likely the particles aggregate and hence more stable is the colloidal solution. In this study, RCFA and SECFA exhibited the static charges of -27.3 mV and -28.2 mV respectively, as mentioned in **Figure S1 (a)** and **S1 (b)**. Although there is no significant difference between the values of RCFA and SECFA. However, SECFA has less possibility to aggregate in colloidal form as it possesses more static charge (about 3.19%) than RCFA. The calculated sizes for RCFA and SECFA are 346.6 nm and 315.3 nm respectively as shown in **Figures S1 (c)** and **S1 (d)**. The smaller size of SECFA particles indicates that particular components from RCFA were removed during acidic-basic treatment, which is also mentioned in the XRD section. Both the smaller size and greater static charge on SECFA particles helped in providing more surface area of SECFA and less aggregation of particles which led to improved adsorption of the dye <sup>1</sup>.

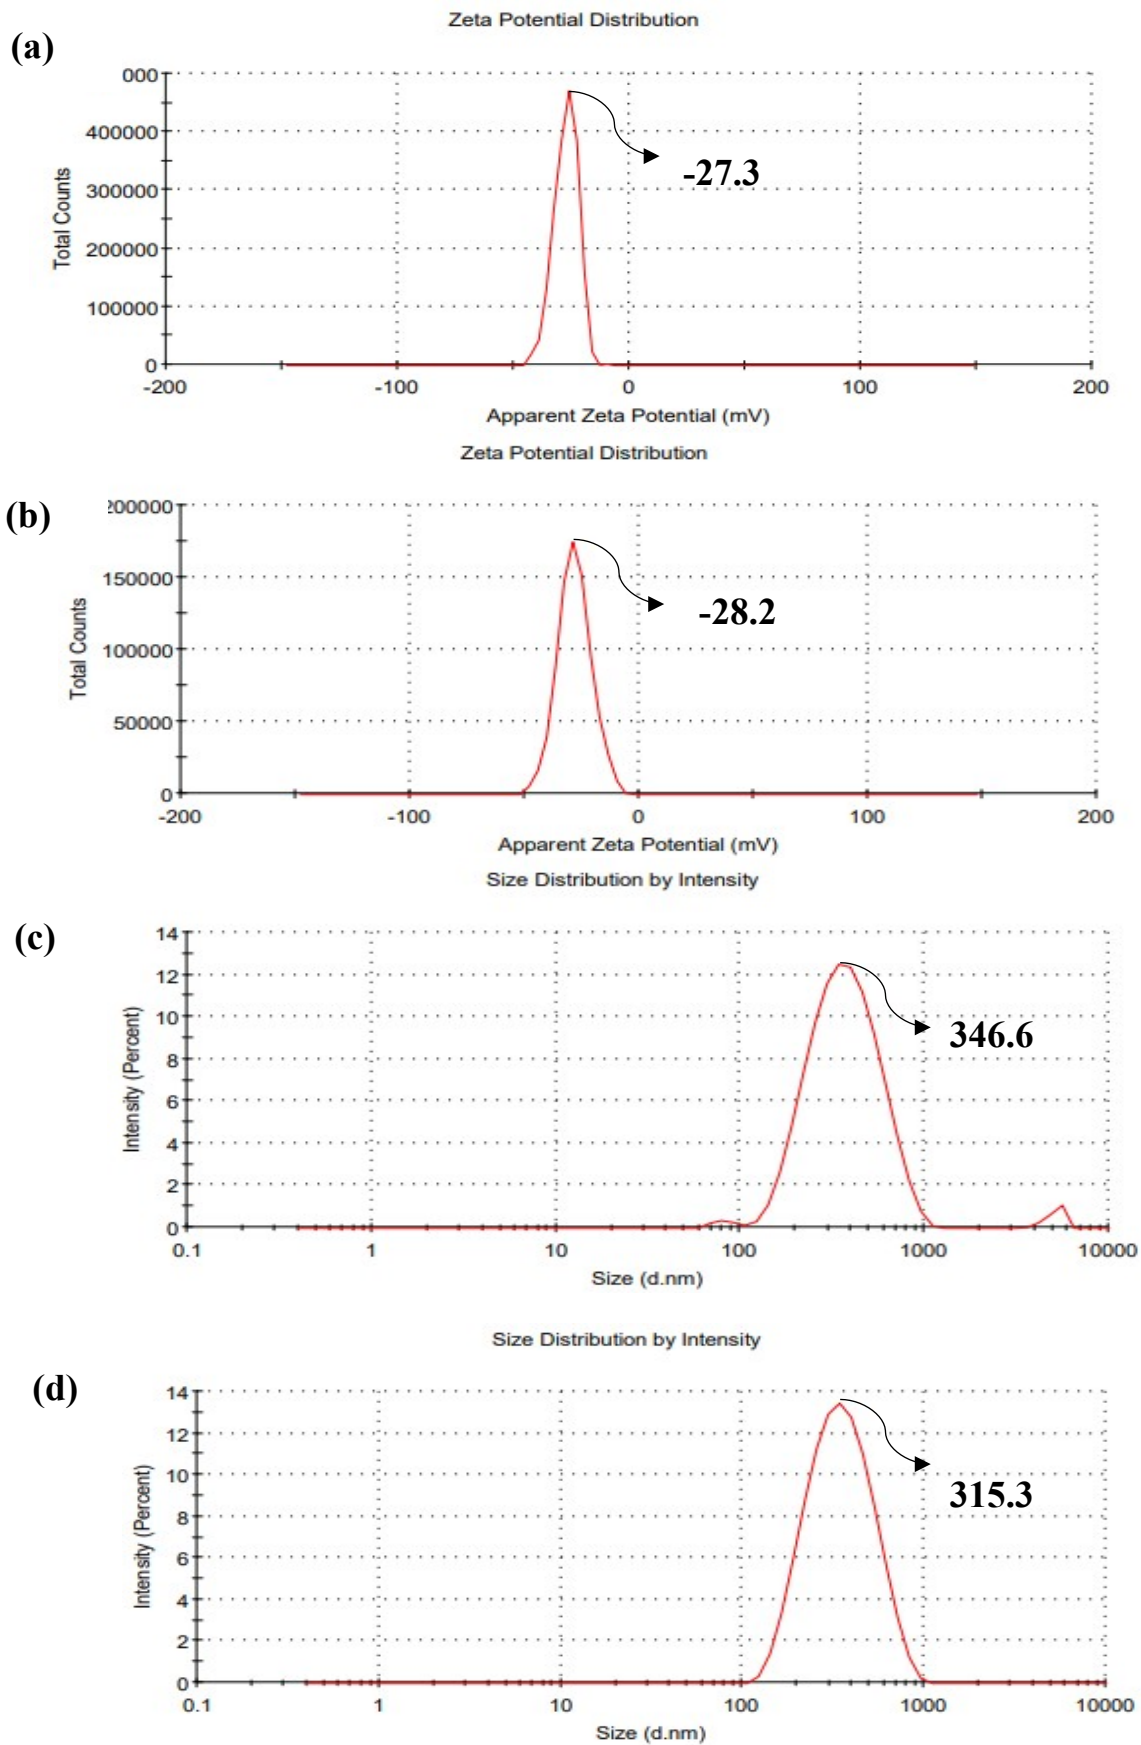

**Figure S1:** Zeta-measurements comparing RCFA and SECFA: Zeta-potentials of RCFA and SECFA are shown in (a) and (b), while Zeta sizes of RCFA and SECFA are shown in (c) and (d) respectively.

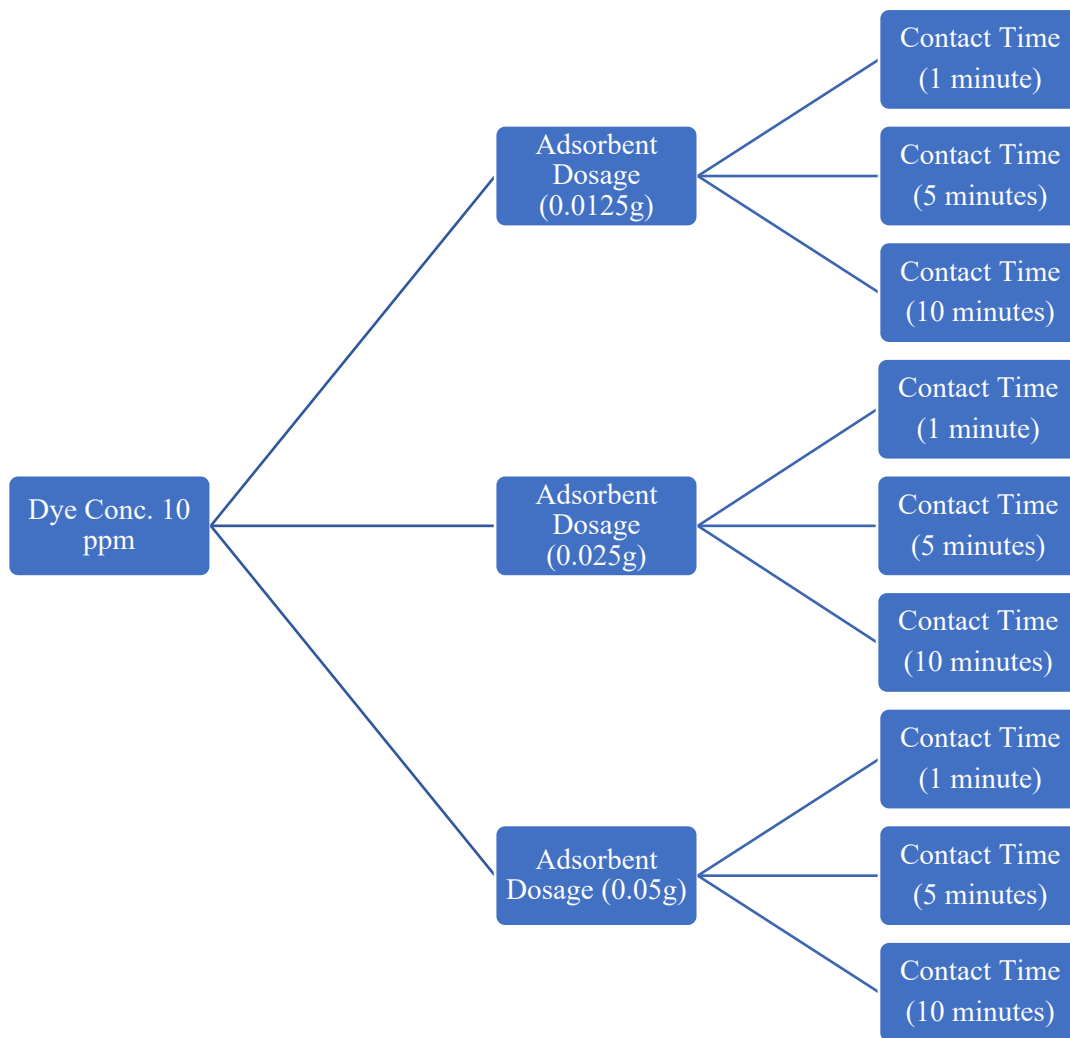

**Scheme S1:** Schematic diagram for 10 ppm dye concentration, and similar experiments have been performed for (20,30,40,50,60,70,80,90,100,110,120,130,140,150,160,170,180,190 and 200) ppm dye concentrations for RCFA and SECFA separately.

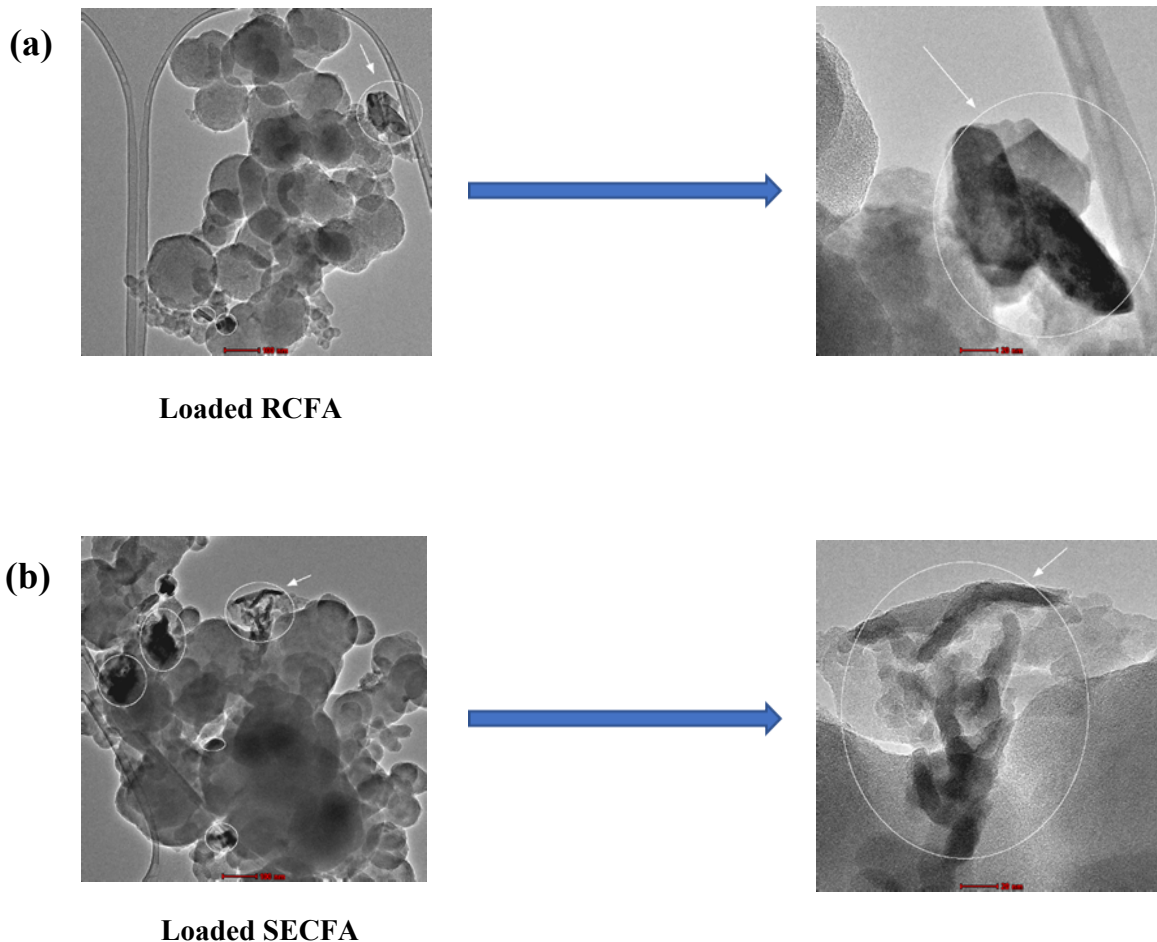

**Figure S2:** Dye loaded surfaces of RCFA and SECFA in (a) and (b) respectively.

**Table S1:** Experimental runs for RCFA

| Runs | Dye conc. in ppm | RCFA dose | Contact time | % age dye removal |
|------|------------------|-----------|--------------|-------------------|
| 1    | 10               | 0.0125    | 1            | 81.5486           |
| 2    | 10               | 0.0125    | 1            | 79.8669           |
| 3    | 10               | 0.0125    | 5            | 89.1269           |
| 4    | 10               | 0.0125    | 5            | 87.0216           |
| 5    | 10               | 0.0125    | 10           | 96.2109           |
| 6    | 10               | 0.0125    | 10           | 94.3428           |
| 7    | 10               | 0.025     | 1            | 93.4102           |
| 8    | 10               | 0.025     | 1            | 92.6789           |
| 9    | 10               | 0.025     | 5            | 95.0577           |
| 10   | 10               | 0.025     | 5            | 95.0083           |
| 11   | 10               | 0.025     | 10           | 96.7051           |
| 12   | 10               | 0.025     | 10           | 96.3394           |
| 13   | 10               | 0.05      | 1            | 97.5288           |
| 14   | 10               | 0.05      | 1            | 97.5042           |
| 15   | 10               | 0.05      | 5            | 98.1878           |
| 16   | 10               | 0.05      | 5            | 98.3361           |
| 17   | 10               | 0.05      | 10           | 99.1763           |
| 18   | 10               | 0.05      | 10           | 99.1681           |
| 19   | 20               | 0.0125    | 1            | 67.2587           |
| 20   | 20               | 0.0125    | 1            | 68.3564           |
| 21   | 20               | 0.0125    | 5            | 78.8417           |
| 22   | 20               | 0.0125    | 5            | 77.1889           |
| 23   | 20               | 0.0125    | 10           | 81.7761           |
| 24   | 20               | 0.0125    | 10           | 81.49             |
| 25   | 20               | 0.025     | 1            | 96.9112           |
| 26   | 20               | 0.025     | 1            | 96.6206           |
| 27   | 20               | 0.025     | 5            | 95.9073           |
| 28   | 20               | 0.025     | 5            | 95.6221           |

**Table S2:** Experimental runs for SECFA

| Runs | Dye conc. in ppm | SECFA dose | Contact time | % age dye removal |
|------|------------------|------------|--------------|-------------------|
| 1    | 10               | 0.0125     | 1            | 97.5288           |
| 2    | 10               | 0.0125     | 1            | 97.5042           |
| 3    | 10               | 0.0125     | 5            | 97.8583           |
| 4    | 10               | 0.0125     | 5            | 98.0033           |
| 5    | 10               | 0.0125     | 10           | 98.1878           |
| 6    | 10               | 0.0125     | 10           | 98.3361           |
| 7    | 10               | 0.025      | 1            | 98.1878           |
| 8    | 10               | 0.025      | 1            | 98.1697           |
| 9    | 10               | 0.025      | 5            | 98.5173           |
| 10   | 10               | 0.025      | 5            | 98.3361           |
| 11   | 10               | 0.025      | 10           | 98.3526           |
| 12   | 10               | 0.025      | 10           | 98.6689           |
| 13   | 10               | 0.05       | 1            | 98.0231           |
| 14   | 10               | 0.05       | 1            | 98.0033           |
| 15   | 10               | 0.05       | 5            | 98.3526           |
| 16   | 10               | 0.05       | 5            | 98.1697           |
| 17   | 10               | 0.05       | 10           | 98.5173           |
| 18   | 10               | 0.05       | 10           | 99.168            |
| 19   | 20               | 0.0125     | 1            | 98.3784           |
| 20   | 20               | 0.0125     | 1            | 98.4639           |
| 21   | 20               | 0.0125     | 5            | 98.5328           |
| 22   | 20               | 0.0125     | 5            | 98.4639           |
| 23   | 20               | 0.0125     | 10           | 98.6873           |
| 24   | 20               | 0.0125     | 10           | 98.7711           |
| 25   | 20               | 0.025      | 1            | 98.9961           |
| 26   | 20               | 0.025      | 1            | 99.0015           |
| 27   | 20               | 0.025      | 5            | 99.0734           |
| 28   | 20               | 0.025      | 5            | 99.0783           |

|    |    |        |    |         |
|----|----|--------|----|---------|
| 29 | 20 | 0.025  | 10 | 98.4556 |
| 30 | 20 | 0.025  | 10 | 98.3103 |
| 31 | 20 | 0.05   | 1  | 98.8417 |
| 32 | 20 | 0.05   | 1  | 98.8479 |
| 33 | 20 | 0.05   | 5  | 98.9961 |
| 34 | 20 | 0.05   | 5  | 98.9247 |
| 35 | 20 | 0.05   | 10 | 99.3822 |
| 36 | 20 | 0.05   | 10 | 99.3088 |
| 37 | 30 | 0.0125 | 1  | 55.456  |
| 38 | 30 | 0.0125 | 1  | 55.1471 |
| 39 | 30 | 0.0125 | 5  | 70.6906 |
| 40 | 30 | 0.0125 | 5  | 71.4811 |
| 41 | 30 | 0.0125 | 10 | 79.5994 |
| 42 | 30 | 0.0125 | 10 | 80.5147 |
| 43 | 30 | 0.025  | 1  | 93.0416 |
| 44 | 30 | 0.025  | 1  | 92.6996 |
| 45 | 30 | 0.025  | 5  | 94.7812 |
| 46 | 30 | 0.025  | 5  | 94.9055 |
| 47 | 30 | 0.025  | 10 | 97.048  |
| 48 | 30 | 0.025  | 10 | 97.3739 |
| 49 | 30 | 0.05   | 1  | 98.2604 |
| 50 | 30 | 0.05   | 1  | 98.3718 |
| 51 | 30 | 0.05   | 5  | 98.8403 |
| 52 | 30 | 0.05   | 5  | 98.8445 |
| 53 | 30 | 0.05   | 10 | 99.5256 |
| 54 | 30 | 0.05   | 10 | 99.4748 |
| 55 | 40 | 0.0125 | 1  | 34.6186 |
| 56 | 40 | 0.0125 | 1  | 34.0637 |
| 57 | 40 | 0.0125 | 5  | 43.4909 |
| 58 | 40 | 0.0125 | 5  | 42.993  |
| 59 | 40 | 0.0125 | 10 | 53.7728 |
| 60 | 40 | 0.0125 | 10 | 53.5345 |
| 61 | 40 | 0.025  | 1  | 84.3284 |
| 62 | 40 | 0.025  | 1  | 84.8698 |
| 63 | 40 | 0.025  | 5  | 86.5672 |
| 64 | 40 | 0.025  | 5  | 86.606  |
| 65 | 40 | 0.025  | 10 | 88.806  |
| 66 | 40 | 0.025  | 10 | 88.0529 |
| 67 | 40 | 0.05   | 1  | 96.6418 |
| 68 | 40 | 0.05   | 1  | 96.5688 |
| 69 | 40 | 0.05   | 5  | 97.8027 |
| 70 | 40 | 0.05   | 5  | 97.7263 |
| 71 | 40 | 0.05   | 10 | 98.7148 |
| 72 | 40 | 0.05   | 10 | 98.8012 |
| 73 | 50 | 0.0125 | 1  | 29.366  |
| 74 | 50 | 0.0125 | 1  | 28.694  |
| 75 | 50 | 0.0125 | 5  | 36.6394 |
| 76 | 50 | 0.0125 | 5  | 36.0234 |
| 77 | 50 | 0.0125 | 10 | 44.6908 |
| 78 | 50 | 0.0125 | 10 | 44.2105 |
| 79 | 50 | 0.025  | 1  | 79.2688 |
| 80 | 50 | 0.025  | 1  | 79.0253 |
| 81 | 50 | 0.025  | 5  | 81.4858 |
| 82 | 50 | 0.025  | 5  | 81.7154 |
| 83 | 50 | 0.025  | 10 | 85.2587 |
| 84 | 50 | 0.025  | 10 | 85.1852 |
| 85 | 50 | 0.05   | 1  | 95.527  |
| 86 | 50 | 0.05   | 1  | 95.3606 |
| 87 | 50 | 0.05   | 5  | 96.7717 |
| 88 | 50 | 0.05   | 5  | 96.9981 |
| 89 | 50 | 0.05   | 10 | 98.2497 |
| 90 | 50 | 0.05   | 10 | 98.0117 |
| 91 | 60 | 0.0125 | 1  | 27.9731 |
| 92 | 60 | 0.0125 | 1  | 27.6286 |
| 93 | 60 | 0.0125 | 5  | 35.7143 |

|    |    |        |    |         |
|----|----|--------|----|---------|
| 29 | 20 | 0.025  | 10 | 99.0734 |
| 30 | 20 | 0.025  | 10 | 99.1551 |
| 31 | 20 | 0.05   | 1  | 98.9189 |
| 32 | 20 | 0.05   | 1  | 99.0015 |
| 33 | 20 | 0.05   | 5  | 98.9961 |
| 34 | 20 | 0.05   | 5  | 99.0015 |
| 35 | 20 | 0.05   | 10 | 99.1506 |
| 36 | 20 | 0.05   | 10 | 99.1551 |
| 37 | 30 | 0.0125 | 1  | 96.8371 |
| 38 | 30 | 0.0125 | 1  | 96.9538 |
| 39 | 30 | 0.0125 | 5  | 98.2077 |
| 40 | 30 | 0.0125 | 5  | 98.1618 |
| 41 | 30 | 0.0125 | 10 | 98.5767 |
| 42 | 30 | 0.0125 | 10 | 98.4244 |
| 43 | 30 | 0.025  | 1  | 99.262  |
| 44 | 30 | 0.025  | 1  | 99.2122 |
| 45 | 30 | 0.025  | 5  | 99.262  |
| 46 | 30 | 0.025  | 5  | 99.3172 |
| 47 | 30 | 0.025  | 10 | 99.3147 |
| 48 | 30 | 0.025  | 10 | 99.3697 |
| 49 | 30 | 0.05   | 1  | 99.262  |
| 50 | 30 | 0.05   | 1  | 99.2122 |
| 51 | 30 | 0.05   | 5  | 99.262  |
| 52 | 30 | 0.05   | 5  | 99.3172 |
| 53 | 30 | 0.05   | 10 | 99.262  |
| 54 | 30 | 0.05   | 10 | 99.2647 |
| 55 | 40 | 0.0125 | 1  | 95.7711 |
| 56 | 40 | 0.0125 | 1  | 95.8661 |
| 57 | 40 | 0.0125 | 5  | 97.1393 |
| 58 | 40 | 0.0125 | 5  | 97.1062 |
| 59 | 40 | 0.0125 | 10 | 98.01   |
| 60 | 40 | 0.0125 | 10 | 97.933  |
| 61 | 40 | 0.025  | 1  | 99.2952 |
| 62 | 40 | 0.025  | 1  | 99.2559 |
| 63 | 40 | 0.025  | 5  | 99.3367 |
| 64 | 40 | 0.025  | 5  | 99.3386 |
| 65 | 40 | 0.025  | 10 | 99.4196 |
| 66 | 40 | 0.025  | 10 | 99.3799 |
| 67 | 40 | 0.05   | 1  | 99.3781 |
| 68 | 40 | 0.05   | 1  | 99.3799 |
| 69 | 40 | 0.05   | 5  | 99.3781 |
| 70 | 40 | 0.05   | 5  | 99.4212 |
| 71 | 40 | 0.05   | 10 | 99.4196 |
| 72 | 40 | 0.05   | 10 | 99.3799 |
| 73 | 50 | 0.0125 | 1  | 94.7491 |
| 74 | 50 | 0.0125 | 1  | 94.8928 |
| 75 | 50 | 0.0125 | 5  | 97.0828 |
| 76 | 50 | 0.0125 | 5  | 96.9981 |
| 77 | 50 | 0.0125 | 10 | 97.394  |
| 78 | 50 | 0.0125 | 10 | 97.193  |
| 79 | 50 | 0.025  | 1  | 99.2999 |
| 80 | 50 | 0.025  | 1  | 99.2982 |
| 81 | 50 | 0.025  | 5  | 99.2999 |
| 82 | 50 | 0.025  | 5  | 99.3372 |
| 83 | 50 | 0.025  | 10 | 99.3388 |
| 84 | 50 | 0.025  | 10 | 99.3372 |
| 85 | 50 | 0.05   | 1  | 99.3777 |
| 86 | 50 | 0.05   | 1  | 99.3762 |
| 87 | 50 | 0.05   | 5  | 99.4166 |
| 88 | 50 | 0.05   | 5  | 99.3762 |
| 89 | 50 | 0.05   | 10 | 99.4555 |
| 90 | 50 | 0.05   | 10 | 99.4152 |
| 91 | 60 | 0.0125 | 1  | 90.8003 |
| 92 | 60 | 0.0125 | 1  | 90.865  |
| 93 | 60 | 0.0125 | 5  | 95.1758 |

|     |    |        |    |         |
|-----|----|--------|----|---------|
| 94  | 60 | 0.0125 | 5  | 36.2043 |
| 95  | 60 | 0.0125 | 10 | 39.2296 |
| 96  | 60 | 0.0125 | 10 | 40.1939 |
| 97  | 60 | 0.025  | 1  | 68.9978 |
| 98  | 60 | 0.025  | 1  | 68.8665 |
| 99  | 60 | 0.025  | 5  | 73.5602 |
| 100 | 60 | 0.025  | 5  | 73.1916 |
| 101 | 60 | 0.025  | 10 | 78.1227 |
| 102 | 60 | 0.025  | 10 | 78.7099 |
| 103 | 60 | 0.05   | 1  | 93.6799 |
| 104 | 60 | 0.05   | 1  | 93.5123 |
| 105 | 60 | 0.05   | 5  | 95.9237 |
| 106 | 60 | 0.05   | 5  | 95.824  |
| 107 | 60 | 0.05   | 10 | 97.4944 |
| 108 | 60 | 0.05   | 10 | 97.39   |
| 109 | 70 | 0.0125 | 1  | 22.9893 |
| 110 | 70 | 0.0125 | 1  | 23.745  |
| 111 | 70 | 0.0125 | 5  | 28.1675 |
| 112 | 70 | 0.0125 | 5  | 27.4826 |
| 113 | 70 | 0.0125 | 10 | 30.3342 |
| 114 | 70 | 0.0125 | 10 | 30.7072 |
| 115 | 70 | 0.025  | 1  | 58.9056 |
| 116 | 70 | 0.025  | 1  | 58.7028 |
| 117 | 70 | 0.025  | 5  | 67.0217 |
| 118 | 70 | 0.025  | 5  | 67.6805 |
| 119 | 70 | 0.025  | 10 | 69.8127 |
| 120 | 70 | 0.025  | 10 | 70.5387 |
| 121 | 70 | 0.05   | 1  | 90.0477 |
| 122 | 70 | 0.05   | 1  | 89.7765 |
| 123 | 70 | 0.05   | 5  | 91.7371 |
| 124 | 70 | 0.05   | 5  | 91.6086 |
| 125 | 70 | 0.05   | 10 | 93.6467 |
| 126 | 70 | 0.05   | 10 | 93.6607 |
| 127 | 80 | 0.0125 | 1  | 13.5303 |
| 128 | 80 | 0.0125 | 1  | 12.8383 |
| 129 | 80 | 0.0125 | 5  | 19.329  |
| 130 | 80 | 0.0125 | 5  | 18.7637 |
| 131 | 80 | 0.0125 | 10 | 23.0853 |
| 132 | 80 | 0.0125 | 10 | 22.5311 |
| 133 | 80 | 0.025  | 1  | 48.6506 |
| 134 | 80 | 0.025  | 1  | 48.2809 |
| 135 | 80 | 0.025  | 5  | 55.9446 |
| 136 | 80 | 0.025  | 5  | 55.4133 |
| 137 | 80 | 0.025  | 10 | 64.2961 |
| 138 | 80 | 0.025  | 10 | 63.0212 |
| 139 | 80 | 0.05   | 1  | 82.6039 |
| 140 | 80 | 0.05   | 1  | 82.297  |
| 141 | 80 | 0.05   | 5  | 88.1838 |
| 142 | 80 | 0.05   | 5  | 88.259  |
| 143 | 80 | 0.05   | 10 | 89.8614 |
| 144 | 80 | 0.05   | 10 | 89.7586 |
| 145 | 90 | 0.0125 | 1  | 7.51634 |
| 146 | 90 | 0.0125 | 1  | 7.36152 |
| 147 | 90 | 0.0125 | 5  | 11.329  |
| 148 | 90 | 0.0125 | 5  | 10.7507 |
| 149 | 90 | 0.0125 | 10 | 12.6362 |
| 150 | 90 | 0.0125 | 10 | 11.8805 |
| 151 | 90 | 0.025  | 1  | 40.1598 |
| 152 | 90 | 0.025  | 1  | 39.723  |
| 153 | 90 | 0.025  | 5  | 46.0058 |
| 154 | 90 | 0.025  | 5  | 45.7726 |
| 155 | 90 | 0.025  | 10 | 51.8519 |
| 156 | 90 | 0.025  | 10 | 51.6764 |
| 157 | 90 | 0.05   | 1  | 77.6688 |
| 158 | 90 | 0.05   | 1  | 77.5875 |

|     |    |        |    |         |
|-----|----|--------|----|---------|
| 94  | 60 | 0.0125 | 5  | 95.1529 |
| 95  | 60 | 0.0125 | 10 | 95.8115 |
| 96  | 60 | 0.0125 | 10 | 95.6376 |
| 97  | 60 | 0.025  | 1  | 99.0277 |
| 98  | 60 | 0.025  | 1  | 99.0679 |
| 99  | 60 | 0.025  | 5  | 99.1025 |
| 100 | 60 | 0.025  | 5  | 99.1797 |
| 101 | 60 | 0.025  | 10 | 99.1399 |
| 102 | 60 | 0.025  | 10 | 99.1797 |
| 103 | 60 | 0.05   | 1  | 99.3642 |
| 104 | 60 | 0.05   | 1  | 99.3289 |
| 105 | 60 | 0.05   | 5  | 99.4016 |
| 106 | 60 | 0.05   | 5  | 99.4034 |
| 107 | 60 | 0.05   | 10 | 99.439  |
| 108 | 60 | 0.05   | 10 | 99.4034 |
| 109 | 70 | 0.0125 | 1  | 87.477  |
| 110 | 70 | 0.0125 | 1  | 87.5412 |
| 111 | 70 | 0.0125 | 5  | 91.3698 |
| 112 | 70 | 0.0125 | 5  | 91.2056 |
| 113 | 70 | 0.0125 | 10 | 92.8021 |
| 114 | 70 | 0.0125 | 10 | 92.4881 |
| 115 | 70 | 0.025  | 1  | 98.7147 |
| 116 | 70 | 0.025  | 1  | 98.6442 |
| 117 | 70 | 0.025  | 5  | 98.8248 |
| 118 | 70 | 0.025  | 5  | 98.7541 |
| 119 | 70 | 0.025  | 10 | 98.8615 |
| 120 | 70 | 0.025  | 10 | 98.9007 |
| 121 | 70 | 0.05   | 1  | 99.339  |
| 122 | 70 | 0.05   | 1  | 99.3404 |
| 123 | 70 | 0.05   | 5  | 99.339  |
| 124 | 70 | 0.05   | 5  | 99.4137 |
| 125 | 70 | 0.05   | 10 | 99.3757 |
| 126 | 70 | 0.05   | 10 | 99.3771 |
| 127 | 80 | 0.0125 | 1  | 85.8862 |
| 128 | 80 | 0.0125 | 1  | 85.8449 |
| 129 | 80 | 0.0125 | 5  | 90.0438 |
| 130 | 80 | 0.0125 | 5  | 89.7586 |
| 131 | 80 | 0.0125 | 10 | 91.3202 |
| 132 | 80 | 0.0125 | 10 | 91.1485 |
| 133 | 80 | 0.025  | 1  | 98.1036 |
| 134 | 80 | 0.025  | 1  | 98.1712 |
| 135 | 80 | 0.025  | 5  | 98.6871 |
| 136 | 80 | 0.025  | 5  | 98.6832 |
| 137 | 80 | 0.025  | 10 | 98.7965 |
| 138 | 80 | 0.025  | 10 | 98.9027 |
| 139 | 80 | 0.05   | 1  | 99.2706 |
| 140 | 80 | 0.05   | 1  | 99.2319 |
| 141 | 80 | 0.05   | 5  | 99.3071 |
| 142 | 80 | 0.05   | 5  | 99.3416 |
| 143 | 80 | 0.05   | 10 | 99.3071 |
| 144 | 80 | 0.05   | 10 | 99.2685 |
| 145 | 90 | 0.0125 | 1  | 85.1489 |
| 146 | 90 | 0.0125 | 1  | 85.0583 |
| 147 | 90 | 0.0125 | 5  | 89.252  |
| 148 | 90 | 0.0125 | 5  | 89.0671 |
| 149 | 90 | 0.0125 | 10 | 90.305  |
| 150 | 90 | 0.0125 | 10 | 90.0146 |
| 151 | 90 | 0.025  | 1  | 97.8577 |
| 152 | 90 | 0.025  | 1  | 97.8134 |
| 153 | 90 | 0.025  | 5  | 98.1481 |
| 154 | 90 | 0.025  | 5  | 98.1778 |
| 155 | 90 | 0.025  | 10 | 98.2934 |
| 156 | 90 | 0.025  | 10 | 98.1778 |
| 157 | 90 | 0.05   | 1  | 99.2375 |
| 158 | 90 | 0.05   | 1  | 99.2711 |

|     |     |        |    |         |
|-----|-----|--------|----|---------|
| 159 | 90  | 0.05   | 5  | 84.35   |
| 160 | 90  | 0.05   | 5  | 84.4023 |
| 161 | 90  | 0.05   | 10 | 86.4561 |
| 162 | 90  | 0.05   | 10 | 86.8076 |
| 163 | 100 | 0.0125 | 1  | 3.65545 |
| 164 | 100 | 0.0125 | 1  | 3.71573 |
| 165 | 100 | 0.0125 | 5  | 3.76402 |
| 166 | 100 | 0.0125 | 5  | 5.73593 |
| 167 | 100 | 0.0125 | 10 | 5.86319 |
| 168 | 100 | 0.0125 | 10 | 6.42136 |
| 169 | 100 | 0.025  | 1  | 31.7771 |
| 170 | 100 | 0.025  | 1  | 31.6739 |
| 171 | 100 | 0.025  | 5  | 37.8936 |
| 172 | 100 | 0.025  | 5  | 38.0952 |
| 173 | 100 | 0.025  | 10 | 44.1911 |
| 174 | 100 | 0.025  | 10 | 44.1919 |
| 175 | 100 | 0.05   | 1  | 72.4575 |
| 176 | 100 | 0.05   | 1  | 72.583  |
| 177 | 100 | 0.05   | 5  | 81.4694 |
| 178 | 100 | 0.05   | 5  | 81.9625 |
| 179 | 100 | 0.05   | 10 | 84.3286 |
| 180 | 100 | 0.05   | 10 | 83.9105 |
| 181 | 110 | 0.0125 | 1  | 3.39473 |
| 182 | 110 | 0.0125 | 1  | 3.88629 |
| 183 | 110 | 0.0125 | 5  | 2.70856 |
| 184 | 110 | 0.0125 | 5  | 2.77078 |
| 185 | 110 | 0.0125 | 10 | 3.64753 |
| 186 | 110 | 0.0125 | 10 | 3.74235 |
| 187 | 110 | 0.025  | 1  | 19.8628 |
| 188 | 110 | 0.025  | 1  | 19.6474 |
| 189 | 110 | 0.025  | 5  | 25.8577 |
| 190 | 110 | 0.025  | 5  | 26.3404 |
| 191 | 110 | 0.025  | 10 | 31.8527 |
| 192 | 110 | 0.025  | 10 | 32.0979 |
| 193 | 110 | 0.05   | 1  | 64.3554 |
| 194 | 110 | 0.05   | 1  | 63.7639 |
| 195 | 110 | 0.05   | 5  | 75.8758 |
| 196 | 110 | 0.05   | 5  | 75.1349 |
| 197 | 110 | 0.05   | 10 | 77.5731 |
| 198 | 110 | 0.05   | 10 | 77.294  |
| 199 | 120 | 0.0125 | 1  | 1.80505 |
| 200 | 120 | 0.0125 | 1  | 2.33561 |
| 201 | 120 | 0.0125 | 5  | 2.02166 |
| 202 | 120 | 0.0125 | 5  | 2.58714 |
| 203 | 120 | 0.0125 | 10 | 2.20217 |
| 204 | 120 | 0.0125 | 10 | 2.659   |
| 205 | 120 | 0.025  | 1  | 14.0072 |
| 206 | 120 | 0.025  | 1  | 14.8042 |
| 207 | 120 | 0.025  | 5  | 17.9061 |
| 208 | 120 | 0.025  | 5  | 18.613  |
| 209 | 120 | 0.025  | 10 | 20.1805 |
| 210 | 120 | 0.025  | 10 | 20.9486 |
| 211 | 120 | 0.05   | 1  | 58.4116 |
| 212 | 120 | 0.05   | 1  | 58.8214 |
| 213 | 120 | 0.05   | 5  | 65.5957 |
| 214 | 120 | 0.05   | 5  | 66.0438 |
| 215 | 120 | 0.05   | 10 | 72.13   |
| 216 | 120 | 0.05   | 10 | 72.0086 |
| 217 | 130 | 0.0125 | 1  | 1.8044  |
| 218 | 130 | 0.0125 | 1  | 1.8732  |
| 219 | 130 | 0.0125 | 5  | 1.91267 |
| 220 | 130 | 0.0125 | 5  | 2.12536 |
| 221 | 130 | 0.0125 | 10 | 2.16528 |
| 222 | 130 | 0.0125 | 10 | 2.41354 |
| 223 | 130 | 0.025  | 1  | 8.51678 |

|     |     |        |    |         |
|-----|-----|--------|----|---------|
| 159 | 90  | 0.05   | 5  | 99.2738 |
| 160 | 90  | 0.05   | 5  | 99.3076 |
| 161 | 90  | 0.05   | 10 | 99.3101 |
| 162 | 90  | 0.05   | 10 | 99.2347 |
| 163 | 100 | 0.0125 | 1  | 81.578  |
| 164 | 100 | 0.0125 | 1  | 81.4214 |
| 165 | 100 | 0.0125 | 5  | 88.2374 |
| 166 | 100 | 0.0125 | 5  | 88.1313 |
| 167 | 100 | 0.0125 | 10 | 89.2146 |
| 168 | 100 | 0.0125 | 10 | 89.1775 |
| 169 | 100 | 0.025  | 1  | 97.3579 |
| 170 | 100 | 0.025  | 1  | 97.2944 |
| 171 | 100 | 0.025  | 5  | 97.9008 |
| 172 | 100 | 0.025  | 5  | 97.8355 |
| 173 | 100 | 0.025  | 10 | 98.0456 |
| 174 | 100 | 0.025  | 10 | 97.8716 |
| 175 | 100 | 0.05   | 1  | 99.2038 |
| 176 | 100 | 0.05   | 1  | 99.1703 |
| 177 | 100 | 0.05   | 5  | 99.24   |
| 178 | 100 | 0.05   | 5  | 99.2424 |
| 179 | 100 | 0.05   | 10 | 99.2761 |
| 180 | 100 | 0.05   | 10 | 99.2785 |
| 181 | 110 | 0.0125 | 1  | 80.2456 |
| 182 | 110 | 0.0125 | 1  | 80.2087 |
| 183 | 110 | 0.0125 | 5  | 86.0599 |
| 184 | 110 | 0.0125 | 5  | 85.9302 |
| 185 | 110 | 0.0125 | 10 | 87.8295 |
| 186 | 110 | 0.0125 | 10 | 87.7654 |
| 187 | 110 | 0.025  | 1  | 96.533  |
| 188 | 110 | 0.025  | 1  | 96.5455 |
| 189 | 110 | 0.025  | 5  | 96.8942 |
| 190 | 110 | 0.025  | 5  | 96.7254 |
| 191 | 110 | 0.025  | 10 | 97.147  |
| 192 | 110 | 0.025  | 10 | 96.9773 |
| 193 | 110 | 0.05   | 1  | 99.1333 |
| 194 | 110 | 0.05   | 1  | 99.1724 |
| 195 | 110 | 0.05   | 5  | 99.1694 |
| 196 | 110 | 0.05   | 5  | 99.2803 |
| 197 | 110 | 0.05   | 10 | 99.2055 |
| 198 | 110 | 0.05   | 10 | 99.1724 |
| 199 | 120 | 0.0125 | 1  | 79.1336 |
| 200 | 120 | 0.0125 | 1  | 79.1592 |
| 201 | 120 | 0.0125 | 5  | 84.5487 |
| 202 | 120 | 0.0125 | 5  | 84.549  |
| 203 | 120 | 0.0125 | 10 | 85.9928 |
| 204 | 120 | 0.0125 | 10 | 86.0582 |
| 205 | 120 | 0.025  | 1  | 96.1733 |
| 206 | 120 | 0.025  | 1  | 96.0474 |
| 207 | 120 | 0.025  | 5  | 96.4982 |
| 208 | 120 | 0.025  | 5  | 96.4068 |
| 209 | 120 | 0.025  | 10 | 96.4982 |
| 210 | 120 | 0.025  | 10 | 96.4068 |
| 211 | 120 | 0.05   | 1  | 99.0253 |
| 212 | 120 | 0.05   | 1  | 98.9939 |
| 213 | 120 | 0.05   | 5  | 99.0614 |
| 214 | 120 | 0.05   | 5  | 99.0658 |
| 215 | 120 | 0.05   | 10 | 99.0614 |
| 216 | 120 | 0.05   | 10 | 99.1017 |
| 217 | 130 | 0.0125 | 1  | 78.3111 |
| 218 | 130 | 0.0125 | 1  | 78.062  |
| 219 | 130 | 0.0125 | 5  | 82.5695 |
| 220 | 130 | 0.0125 | 5  | 82.6009 |
| 221 | 130 | 0.0125 | 10 | 84.0491 |
| 222 | 130 | 0.0125 | 10 | 84.1499 |
| 223 | 130 | 0.025  | 1  | 94.6229 |



|     |     |        |    |         |
|-----|-----|--------|----|---------|
| 224 | 130 | 0.025  | 1  | 8.82565 |
| 225 | 130 | 0.025  | 5  | 13.0639 |
| 226 | 130 | 0.025  | 5  | 12.8602 |
| 227 | 130 | 0.025  | 10 | 15.59   |
| 228 | 130 | 0.025  | 10 | 15.1297 |
| 229 | 130 | 0.05   | 1  | 54.8178 |
| 230 | 130 | 0.05   | 1  | 54.8991 |
| 231 | 130 | 0.05   | 5  | 60.3031 |
| 232 | 130 | 0.05   | 5  | 57.4928 |
| 233 | 130 | 0.05   | 10 | 67.6651 |
| 234 | 130 | 0.05   | 10 | 67.7594 |
| 235 | 140 | 0.0125 | 1  | 1.73098 |
| 236 | 140 | 0.0125 | 1  | 2.08558 |
| 237 | 140 | 0.0125 | 5  | 1.94735 |
| 238 | 140 | 0.0125 | 5  | 2.33729 |
| 239 | 140 | 0.0125 | 10 | 1.98341 |
| 240 | 140 | 0.0125 | 10 | 2.19346 |
| 241 | 140 | 0.025  | 1  | 8.07789 |
| 242 | 140 | 0.025  | 1  | 8.30636 |
| 243 | 140 | 0.025  | 5  | 8.94338 |
| 244 | 140 | 0.025  | 5  | 9.20532 |
| 245 | 140 | 0.025  | 10 | 9.62856 |
| 246 | 140 | 0.025  | 10 | 9.78065 |
| 247 | 140 | 0.05   | 1  | 47.6019 |
| 248 | 140 | 0.05   | 1  | 47.7526 |
| 249 | 140 | 0.05   | 5  | 56.5453 |
| 250 | 140 | 0.05   | 5  | 57.0658 |
| 251 | 140 | 0.05   | 10 | 61.8824 |
| 252 | 140 | 0.05   | 10 | 61.8842 |
| 253 | 150 | 0.0125 | 1  | 1.6943  |
| 254 | 150 | 0.0125 | 1  | 1.55179 |
| 255 | 150 | 0.0125 | 5  | 2.05479 |
| 256 | 150 | 0.0125 | 5  | 1.91267 |
| 257 | 150 | 0.0125 | 10 | 1.9106  |
| 258 | 150 | 0.0125 | 10 | 2.02093 |
| 259 | 150 | 0.025  | 1  | 7.4261  |
| 260 | 150 | 0.025  | 1  | 7.32588 |
| 261 | 150 | 0.025  | 5  | 8.72386 |
| 262 | 150 | 0.025  | 5  | 8.58896 |
| 263 | 150 | 0.025  | 10 | 9.01226 |
| 264 | 150 | 0.025  | 10 | 9.02201 |
| 265 | 150 | 0.05   | 1  | 44.088  |
| 266 | 150 | 0.05   | 1  | 43.847  |
| 267 | 150 | 0.05   | 5  | 50.9373 |
| 268 | 150 | 0.05   | 5  | 50.4872 |
| 269 | 150 | 0.05   | 10 | 58.5797 |
| 270 | 150 | 0.05   | 10 | 58.4987 |
| 271 | 160 | 0.0125 | 1  | 1.76386 |
| 272 | 160 | 0.0125 | 1  | 1.55067 |
| 273 | 160 | 0.0125 | 5  | 2.08783 |
| 274 | 160 | 0.0125 | 5  | 1.87523 |
| 275 | 160 | 0.0125 | 10 | 2.23182 |
| 276 | 160 | 0.0125 | 10 | 2.05554 |
| 277 | 160 | 0.025  | 1  | 6.83945 |
| 278 | 160 | 0.025  | 1  | 6.52723 |
| 279 | 160 | 0.025  | 5  | 7.4514  |
| 280 | 160 | 0.025  | 5  | 7.35665 |
| 281 | 160 | 0.025  | 10 | 7.59539 |
| 282 | 160 | 0.025  | 10 | 7.42878 |
| 283 | 160 | 0.05   | 1  | 41.1087 |
| 284 | 160 | 0.05   | 1  | 40.8943 |
| 285 | 160 | 0.05   | 5  | 47.3002 |
| 286 | 160 | 0.05   | 5  | 47.2052 |
| 287 | 160 | 0.05   | 10 | 51.4399 |
| 288 | 160 | 0.05   | 10 | 51.6769 |

|     |     |        |    |         |
|-----|-----|--------|----|---------|
| 224 | 130 | 0.025  | 1  | 94.5965 |
| 225 | 130 | 0.025  | 5  | 95.1642 |
| 226 | 130 | 0.025  | 5  | 94.9207 |
| 227 | 130 | 0.025  | 10 | 95.4168 |
| 228 | 130 | 0.025  | 10 | 95.9294 |
| 229 | 130 | 0.05   | 1  | 98.9534 |
| 230 | 130 | 0.05   | 1  | 98.9193 |
| 231 | 130 | 0.05   | 5  | 98.9534 |
| 232 | 130 | 0.05   | 5  | 98.9193 |
| 233 | 130 | 0.05   | 10 | 98.9895 |
| 234 | 130 | 0.05   | 10 | 99.0634 |
| 235 | 140 | 0.0125 | 1  | 77.1367 |
| 236 | 140 | 0.0125 | 1  | 77.3463 |
| 237 | 140 | 0.0125 | 5  | 81.1756 |
| 238 | 140 | 0.0125 | 5  | 81.2298 |
| 239 | 140 | 0.0125 | 10 | 82.1132 |
| 240 | 140 | 0.0125 | 10 | 81.913  |
| 241 | 140 | 0.025  | 1  | 93.7252 |
| 242 | 140 | 0.025  | 1  | 93.7433 |
| 243 | 140 | 0.025  | 5  | 94.2661 |
| 244 | 140 | 0.025  | 5  | 94.1028 |
| 245 | 140 | 0.025  | 10 | 94.6628 |
| 246 | 140 | 0.025  | 10 | 94.5703 |
| 247 | 140 | 0.05   | 1  | 98.8821 |
| 248 | 140 | 0.05   | 1  | 98.8134 |
| 249 | 140 | 0.05   | 5  | 98.8821 |
| 250 | 140 | 0.05   | 5  | 98.9213 |
| 251 | 140 | 0.05   | 10 | 98.9181 |
| 252 | 140 | 0.05   | 10 | 98.9572 |
| 253 | 150 | 0.0125 | 1  | 76.0274 |
| 254 | 150 | 0.0125 | 1  | 75.821  |
| 255 | 150 | 0.0125 | 5  | 79.1637 |
| 256 | 150 | 0.0125 | 5  | 79.0689 |
| 257 | 150 | 0.0125 | 10 | 81.1103 |
| 258 | 150 | 0.0125 | 10 | 80.8733 |
| 259 | 150 | 0.025  | 1  | 92.8262 |
| 260 | 150 | 0.025  | 1  | 92.7824 |
| 261 | 150 | 0.025  | 5  | 93.5833 |
| 262 | 150 | 0.025  | 5  | 93.3959 |
| 263 | 150 | 0.025  | 10 | 93.9077 |
| 264 | 150 | 0.025  | 10 | 93.865  |
| 265 | 150 | 0.05   | 1  | 98.5941 |
| 266 | 150 | 0.05   | 1  | 98.5565 |
| 267 | 150 | 0.05   | 5  | 98.6662 |
| 268 | 150 | 0.05   | 5  | 98.7369 |
| 269 | 150 | 0.05   | 10 | 98.7383 |
| 270 | 150 | 0.05   | 10 | 98.8091 |
| 271 | 160 | 0.0125 | 1  | 75.414  |
| 272 | 160 | 0.0125 | 1  | 75.3696 |
| 273 | 160 | 0.0125 | 5  | 77.8978 |
| 274 | 160 | 0.0125 | 5  | 77.5694 |
| 275 | 160 | 0.0125 | 10 | 79.1937 |
| 276 | 160 | 0.0125 | 10 | 79.084  |
| 277 | 160 | 0.025  | 1  | 90.6767 |
| 278 | 160 | 0.025  | 1  | 90.4436 |
| 279 | 160 | 0.025  | 5  | 92.0446 |
| 280 | 160 | 0.025  | 5  | 92.0303 |
| 281 | 160 | 0.025  | 10 | 93.0166 |
| 282 | 160 | 0.025  | 10 | 92.6794 |
| 283 | 160 | 0.05   | 1  | 97.9482 |
| 284 | 160 | 0.05   | 1  | 97.8363 |
| 285 | 160 | 0.05   | 5  | 98.1641 |
| 286 | 160 | 0.05   | 5  | 98.1969 |
| 287 | 160 | 0.05   | 10 | 98.3081 |
| 288 | 160 | 0.05   | 10 | 98.1969 |

|     |     |        |    |         |
|-----|-----|--------|----|---------|
| 289 | 170 | 0.0125 | 1  | 1.69126 |
| 290 | 170 | 0.0125 | 1  | 1.47748 |
| 291 | 170 | 0.0125 | 5  | 2.08708 |
| 292 | 170 | 0.0125 | 5  | 1.83784 |
| 293 | 170 | 0.0125 | 10 | 2.19503 |
| 294 | 170 | 0.0125 | 10 | 2.01802 |
| 295 | 170 | 0.025  | 1  | 6.33321 |
| 296 | 170 | 0.025  | 1  | 6.12613 |
| 297 | 170 | 0.025  | 5  | 6.69306 |
| 298 | 170 | 0.025  | 5  | 6.41441 |
| 299 | 170 | 0.025  | 10 | 7.08888 |
| 300 | 170 | 0.025  | 10 | 6.88288 |
| 301 | 170 | 0.05   | 1  | 29.2191 |
| 302 | 170 | 0.05   | 1  | 28.3604 |
| 303 | 170 | 0.05   | 5  | 39.0788 |
| 304 | 170 | 0.05   | 5  | 38.7387 |
| 305 | 170 | 0.05   | 10 | 45.2321 |
| 306 | 170 | 0.05   | 10 | 44.8288 |
| 307 | 180 | 0.0125 | 1  | 1.72476 |
| 308 | 180 | 0.0125 | 1  | 1.72476 |
| 309 | 180 | 0.0125 | 5  | 2.08408 |
| 310 | 180 | 0.0125 | 5  | 2.12001 |
| 311 | 180 | 0.0125 | 10 | 2.22781 |
| 312 | 180 | 0.0125 | 10 | 2.19188 |
| 313 | 180 | 0.025  | 1  | 4.38376 |
| 314 | 180 | 0.025  | 1  | 4.85088 |
| 315 | 180 | 0.025  | 5  | 4.67122 |
| 316 | 180 | 0.025  | 5  | 4.77902 |
| 317 | 180 | 0.025  | 10 | 4.88681 |
| 318 | 180 | 0.025  | 10 | 4.74308 |
| 319 | 180 | 0.05   | 1  | 22.9249 |
| 320 | 180 | 0.05   | 1  | 23.1764 |
| 321 | 180 | 0.05   | 5  | 33.2016 |
| 322 | 180 | 0.05   | 5  | 32.2673 |
| 323 | 180 | 0.05   | 10 | 36.7589 |
| 324 | 180 | 0.05   | 10 | 36.4714 |
| 325 | 190 | 0.0125 | 1  | 1.75943 |
| 326 | 190 | 0.0125 | 1  | 1.7229  |
| 327 | 190 | 0.0125 | 5  | 2.11849 |
| 328 | 190 | 0.0125 | 5  | 2.11773 |
| 329 | 190 | 0.0125 | 10 | 2.19031 |
| 330 | 190 | 0.0125 | 10 | 2.18952 |
| 331 | 190 | 0.025  | 1  | 3.44704 |
| 332 | 190 | 0.025  | 1  | 3.73295 |
| 333 | 190 | 0.025  | 5  | 4.09336 |
| 334 | 190 | 0.025  | 5  | 4.16368 |
| 335 | 190 | 0.025  | 10 | 4.3447  |
| 336 | 190 | 0.025  | 10 | 4.34314 |
| 337 | 190 | 0.05   | 1  | 18.5278 |
| 338 | 190 | 0.05   | 1  | 18.5212 |
| 339 | 190 | 0.05   | 5  | 24.5601 |
| 340 | 190 | 0.05   | 5  | 25.0179 |
| 341 | 190 | 0.05   | 10 | 32.9623 |
| 342 | 190 | 0.05   | 10 | 32.8428 |
| 343 | 200 | 0.0125 | 1  | 1.7934  |
| 344 | 200 | 0.0125 | 1  | 1.7569  |
| 345 | 200 | 0.0125 | 5  | 2.15208 |
| 346 | 200 | 0.0125 | 5  | 2.15131 |
| 347 | 200 | 0.0125 | 10 | 2.22382 |
| 348 | 200 | 0.0125 | 10 | 2.29473 |
| 349 | 200 | 0.025  | 1  | 3.12052 |
| 350 | 200 | 0.025  | 1  | 2.86841 |
| 351 | 200 | 0.025  | 5  | 3.55093 |
| 352 | 200 | 0.025  | 5  | 3.5138  |
| 353 | 200 | 0.025  | 10 | 3.94548 |

|     |     |        |    |         |
|-----|-----|--------|----|---------|
| 289 | 170 | 0.0125 | 1  | 74.6312 |
| 290 | 170 | 0.0125 | 1  | 74.7748 |
| 291 | 170 | 0.0125 | 5  | 76.3584 |
| 292 | 170 | 0.0125 | 5  | 76.1081 |
| 293 | 170 | 0.0125 | 10 | 77.4379 |
| 294 | 170 | 0.0125 | 10 | 77.1532 |
| 295 | 170 | 0.025  | 1  | 89.4926 |
| 296 | 170 | 0.025  | 1  | 88.973  |
| 297 | 170 | 0.025  | 5  | 90.7521 |
| 298 | 170 | 0.025  | 5  | 90.4144 |
| 299 | 170 | 0.025  | 10 | 91.3998 |
| 300 | 170 | 0.025  | 10 | 91.2793 |
| 301 | 170 | 0.05   | 1  | 96.8694 |
| 302 | 170 | 0.05   | 1  | 96.7568 |
| 303 | 170 | 0.05   | 5  | 97.769  |
| 304 | 170 | 0.05   | 5  | 97.8378 |
| 305 | 170 | 0.05   | 10 | 98.0569 |
| 306 | 170 | 0.05   | 10 | 97.9099 |
| 307 | 180 | 0.0125 | 1  | 73.9849 |
| 308 | 180 | 0.0125 | 1  | 73.949  |
| 309 | 180 | 0.0125 | 5  | 75.2425 |
| 310 | 180 | 0.0125 | 5  | 75.0629 |
| 311 | 180 | 0.0125 | 10 | 76.3564 |
| 312 | 180 | 0.0125 | 10 | 76.0331 |
| 313 | 180 | 0.025  | 1  | 88.2501 |
| 314 | 180 | 0.025  | 1  | 88.1423 |
| 315 | 180 | 0.025  | 5  | 89.3281 |
| 316 | 180 | 0.025  | 5  | 89.2203 |
| 317 | 180 | 0.025  | 10 | 90.0467 |
| 318 | 180 | 0.025  | 10 | 89.9389 |
| 319 | 180 | 0.05   | 1  | 96.6942 |
| 320 | 180 | 0.05   | 1  | 96.7661 |
| 321 | 180 | 0.05   | 5  | 97.3051 |
| 322 | 180 | 0.05   | 5  | 97.1613 |
| 323 | 180 | 0.05   | 10 | 97.9878 |
| 324 | 180 | 0.05   | 10 | 98.1315 |
| 325 | 190 | 0.0125 | 1  | 73.6804 |
| 326 | 190 | 0.0125 | 1  | 73.6181 |
| 327 | 190 | 0.0125 | 5  | 74.3268 |
| 328 | 190 | 0.0125 | 5  | 74.0129 |
| 329 | 190 | 0.0125 | 10 | 71.5978 |
| 330 | 190 | 0.0125 | 10 | 74.8744 |
| 331 | 190 | 0.025  | 1  | 86.6786 |
| 332 | 190 | 0.025  | 1  | 86.7193 |
| 333 | 190 | 0.025  | 5  | 88.0072 |
| 334 | 190 | 0.025  | 5  | 88.2268 |
| 335 | 190 | 0.025  | 10 | 89.1921 |
| 336 | 190 | 0.025  | 10 | 88.837  |
| 337 | 190 | 0.05   | 1  | 96.553  |
| 338 | 190 | 0.05   | 1  | 96.4824 |
| 339 | 190 | 0.05   | 5  | 97.0916 |
| 340 | 190 | 0.05   | 5  | 96.9849 |
| 341 | 190 | 0.05   | 10 | 97.5943 |
| 342 | 190 | 0.05   | 10 | 97.4874 |
| 343 | 200 | 0.0125 | 1  | 73.4577 |
| 344 | 200 | 0.0125 | 1  | 73.6106 |
| 345 | 200 | 0.0125 | 5  | 73.8881 |
| 346 | 200 | 0.0125 | 5  | 73.754  |
| 347 | 200 | 0.0125 | 10 | 74.3185 |
| 348 | 200 | 0.0125 | 10 | 74.2202 |
| 349 | 200 | 0.025  | 1  | 84.9713 |
| 350 | 200 | 0.025  | 1  | 84.9408 |
| 351 | 200 | 0.025  | 5  | 86.693  |
| 352 | 200 | 0.025  | 5  | 86.877  |
| 353 | 200 | 0.025  | 10 | 87.9842 |

|     |     |       |    |         |
|-----|-----|-------|----|---------|
| 354 | 200 | 0.025 | 10 | 3.90821 |
| 355 | 200 | 0.05  | 1  | 15.4591 |
| 356 | 200 | 0.05  | 1  | 15.3819 |
| 357 | 200 | 0.05  | 5  | 16.2482 |
| 358 | 200 | 0.05  | 5  | 15.9914 |
| 359 | 200 | 0.05  | 10 | 22.9197 |
| 360 | 200 | 0.05  | 10 | 22.8756 |

|     |     |       |    |         |
|-----|-----|-------|----|---------|
| 354 | 200 | 0.025 | 10 | 88.0244 |
| 355 | 200 | 0.05  | 1  | 96.3773 |
| 356 | 200 | 0.05  | 1  | 96.2711 |
| 357 | 200 | 0.05  | 5  | 96.5567 |
| 358 | 200 | 0.05  | 5  | 96.7372 |
| 359 | 200 | 0.05  | 10 | 96.9871 |
| 360 | 200 | 0.05  | 10 | 96.9165 |

**Table S3:** Langmuir isotherm values using RCFA and SECFA adsorbents

| <b>RCFA LANGMUIR ISOTHERM</b>  |                                         |           |           |           |           |           |            |           |           |
|--------------------------------|-----------------------------------------|-----------|-----------|-----------|-----------|-----------|------------|-----------|-----------|
| Contact time (minutes)         | 1                                       |           |           | 5         |           |           | 10         |           |           |
| Dosage (g)                     | 0.0125                                  | 0.025     | 0.05      | 0.0125    | 0.025     | 0.05      | 0.0125     | 0.025     | 0.05      |
| Slope                          | 0.4801                                  | 0.3288    | 0.1332    | 0.3982    | 0.2905    | 0.1146    | 0.3757     | 0.2725    | 0.0874    |
| Intercept                      | -10.1844                                | -7.4252   | -1.3674   | -6.8907   | -6.3033   | -1.0684   | -7.6640    | -5.5631   | -0.5177   |
| $q_{max}$ (mg/g)               | 2.0825                                  | 3.0409    | 7.5030    | 2.5111    | 3.4413    | 8.7244    | 2.6616     | 3.6697    | 11.4377   |
| $K_L$ (L/mg)                   | -0.2044                                 | -0.4095   | -5.4867   | -0.3644   | -0.5459   | -8.1653   | -0.3472    | -0.6596   | -22.0903  |
| $R^2$                          | 0.8920                                  | 0.8432    | 0.9010    | 0.8709    | 0.8525    | 0.8572    | 0.8811     | 0.8615    | 0.9229    |
| $R^2$ mean                     | $\Sigma R^2 / \text{total no. of } R^2$ |           |           |           |           |           |            |           |           |
| -                              | 0.8758                                  |           |           |           |           |           |            |           |           |
| <b>SECFA LANGMUIR ISOTHERM</b> |                                         |           |           |           |           |           |            |           |           |
| Contact time                   | 1 minute                                |           |           | 5 minutes |           |           | 10 minutes |           |           |
| Dosage (g)                     | 0.0125                                  | 0.025     | 0.05      | 0.0125    | 0.025     | 0.05      | 0.0125     | 0.025     | 0.05      |
| Slope                          | 0.0083                                  | 0.0144    | 0.0223    | 0.0083    | 0.0141    | 0.0213    | 0.0083     | 0.0139    | 0.0203    |
| Intercept                      | 0.0750                                  | 0.0276    | 0.0316    | 0.0486    | 0.0247    | 0.0299    | 0.0419     | 0.0234    | 0.0292    |
| $q_{max}$ (mg/g)               | 120.3369                                | 69.3481   | 44.8028   | 119.6172  | 70.5716   | 46.8164   | 119.6172   | 71.5307   | 49.1159   |
| $K_L$ (L/mg)                   | 1604.0648                               | 2505.3514 | 1415.1253 | 2461.7663 | 2852.5315 | 1562.6328 | 2854.8263  | 3058.1769 | 1678.0291 |
| $R^2$                          | 0.9316                                  | 0.9928    | 0.9002    | 0.9729    | 0.9920    | 0.8922    | 0.9797     | 0.9913    | 0.8814    |
| $R^2$ mean                     | $\Sigma R^2 / \text{total no. of } R^2$ |           |           |           |           |           |            |           |           |
| -                              | 0.9428                                  |           |           |           |           |           |            |           |           |

**Table S4:** Freundlich isotherm values using RCFA and SECFA adsorbents

| <b>RCFA FREUNDLICH ISOTHERM</b> |                                         |         |        |           |         |        |            |         |        |
|---------------------------------|-----------------------------------------|---------|--------|-----------|---------|--------|------------|---------|--------|
| Contact time                    | 1 minute                                |         |        | 5 minutes |         |        | 10 minutes |         |        |
| Dosage (g)                      | 0.0125                                  | 0.025   | 0.05   | 0.0125    | 0.025   | 0.05   | 0.0125     | 0.025   | 0.05   |
| Slope                           | -0.4336                                 | -0.1371 | 0.1450 | -0.3859   | -0.1101 | 0.1687 | -0.3247    | -0.0864 | 0.1826 |
| Intercept                       | 1.4353                                  | 1.0665  | 0.8011 | 1.4117    | 1.0727  | 0.8376 | 1.40144    | 1.0633  | 0.8800 |
| 1/n                             | -0.4336                                 | -0.1371 | 0.1450 | -0.3859   | -0.1101 | 0.1687 | -0.3247    | -0.0864 | 0.1826 |
| $K_f$                           | 27.2464                                 | 11.6570 | 6.3260 | 25.8095   | 11.8230 | 6.8810 | 25.2022    | 11.5701 | 7.5859 |
| $R^2$                           | 0.4501                                  | 0.0963  | 0.3368 | 0.3879    | 0.0483  | 0.4432 | 0.2261     | 0.0194  | 0.6084 |
| $R^2$ mean                      | $\Sigma R^2 / \text{total no. of } R^2$ |         |        |           |         |        |            |         |        |

| -                                | 0.2907                                  |         |         |           |         |         |            |         |         |
|----------------------------------|-----------------------------------------|---------|---------|-----------|---------|---------|------------|---------|---------|
| <b>SECFA FREUNDLICH ISOTHERM</b> |                                         |         |         |           |         |         |            |         |         |
| Contact time                     | 1 minute                                |         |         | 5 minutes |         |         | 10 minutes |         |         |
| Dosage (g)                       | 0.0125                                  | 0.025   | 0.05    | 0.0125    | 0.025   | 0.05    | 0.0125     | 0.025   | 0.05    |
| Slope                            | 0.4153                                  | 0.4027  | 0.5809  | 0.3948    | 0.4067  | 0.6101  | 0.3872     | 0.4110  | 0.6447  |
| Intercept                        | 1.3238                                  | 1.3321  | 1.2115  | 1.4058    | 1.3544  | 1.2374  | 1.4339     | 1.3671  | 1.2562  |
| 1/n                              | 0.4153                                  | 0.4027  | 0.5809  | 0.3948    | 0.4067  | 0.6101  | 0.3872     | 0.4110  | 0.6447  |
| $K_f$                            | 21.0799                                 | 21.4822 | 16.2745 | 25.4589   | 22.6198 | 17.2742 | 27.1612    | 23.2905 | 18.0401 |
| $R^2$                            | 0.9653                                  | 0.8338  | 0.7621  | 0.9464    | 0.8361  | 0.7850  | 0.9461     | 0.8386  | 0.8202  |
| $R^2$ mean                       | $\Sigma R^2 / \text{total no. of } R^2$ |         |         |           |         |         |            |         |         |
| -                                | 0.8592                                  |         |         |           |         |         |            |         |         |

**Table S5:** For the determination of spontaneity of the adsorption process

| ppm | RCFA Dosage            |                               |                        |                               |                        |                               | SECFA Dosage           |                               |                        |                               |                        |                               |
|-----|------------------------|-------------------------------|------------------------|-------------------------------|------------------------|-------------------------------|------------------------|-------------------------------|------------------------|-------------------------------|------------------------|-------------------------------|
|     | 0.0125g                |                               | 0.025g                 |                               | 0.05g                  |                               | 0.0125g                |                               | 0.025g                 |                               | 0.05g                  |                               |
|     | $K_1(\text{min}^{-1})$ | $\Delta G(\text{kJmol}^{-1})$ |
| 10  | 0.1761795              | -14.445723                    | 0.211853               | -13.988885                    | 0.1494877              | -14.852761                    | 0.2027792              | -14.097341                    | 0.3466245              | -12.769054                    | 0.2291255              | -13.7947                      |
| 20  | 0.3350635              | -12.853098                    | 0.1204699              | -15.387456                    | 0.0656125              | -16.892914                    | 0.0719227              | -16.665408                    | 0.2747018              | -13.345227                    | 0.0558017              | -17.294185                    |
| 30  | 0.2538136              | -13.541169                    | 0.1515604              | -14.818644                    | 0.1469775              | -14.894718                    | 0.081457               | -16.35700                     | 0.1733238              | -14.486211                    | 0.1733238              | -14.486211                    |
| 40  | 0.1544852              | -14.771287                    | 0.1829734              | -14.351978                    | 0.1933369              | -14.21548                     | 0.2327412              | -13.755908                    | 0.1733238              | -14.486211                    | 0.141773               | -14.98400                     |
| 50  | 0.160404               | -14.678139                    | 0.1293365              | -15.211505                    | 0.1921163              | -14.231171                    | 0.5699234              | -11.537056                    | 0.1733238              | -14.486211                    | 0.1013781              | -15.814944                    |
| 60  | 0.2888192              | -13.221065                    | 0.1580319              | -14.715051                    | 0.2243122              | -13.847301                    | 0.5418959              | -11.661996                    | 0.4480256              | -12.133288                    | 0.3466245              | -12.769054                    |
| 70  | 0.2439798              | -13.639069                    | 0.3482597              | -12.757394                    | 0.1590222              | -14.699574                    | 0.3327374              | -12.870358                    | 0.1971598              | -14.166968                    | 0.984878               | -10.181786                    |
| 80  | 0.234883               | -13.733212                    | 0.1610027              | -14.668907                    | 0.3833344              | -12.519648                    | 0.3483518              | -12.756738                    | 0.3666606              | -12.629827                    | 0.1733238              | -14.486211                    |
| 90  | 0.3438149              | -12.789218                    | 0.1748668              | -14.464252                    | 0.3461409              | -12.772513                    | 0.4051438              | -12.382553                    | 0.4262623              | -12.25666                     | 0.1733238              | -14.486211                    |
| 100 | 0.1422333              | -14.976009                    | 0.1747747              | -14.465558                    | 0.3936288              | -12.45399                     | 0.5073739              | -11.825083                    | 0.4865548              | -11.92889                     | 0.2291255              | -13.7947                      |
| 110 | 0.7180524              | -10.964637                    | 0.1830885              | -14.35042                     | 0.4842288              | -11.940763                    | 0.3588304              | -12.68331                     | 0.1820982              | -14.363857                    | 0.1733238              | -14.486211                    |
| 120 | 0.2624959              | -13.457835                    | 0.2457301              | -13.621359                    | 0.1917248              | -14.236226                    | 0.3847392              | -12.510585                    | 1.1022388              | -9.9028581                    | 0.3466245              | -12.769054                    |
| 130 | 0.14465143             | -14.9342                      | 0.2565081              | -13.515005                    | 0.0943079              | -15.994054                    | 0.3406137              | -12.812394                    | 0.1305801              | -15.187796                    | 0.0021248              | -25.391214                    |
| 140 | 0.3666606              | -12.629827                    | 0.2189002              | -13.907811                    | 0.2572681              | -13.507675                    | 0.4433505              | -12.159277                    | 0.1784825              | -14.413546                    | 0.2291255              | -13.7947                      |
| 150 | 0.7490738              | -10.859848                    | 0.3788435              | -12.548844                    | 0.1554064              | -14.756557                    | 0.2485398              | -13.593191                    | 0.2508658              | -13.570112                    | 0.2529385              | -13.549726                    |
| 160 | 0.2747018              | -13.345227                    | 0.5093085              | -11.815655                    | 0.2242431              | -13.848064                    | 0.2452465              | -13.62624                     | 0.259433               | -13.486915                    | 0.4024262              | -12.399227                    |
| 170 | 0.3220285              | -12.951408                    | 0.1399303              | -15.016454                    | 0.2439568              | -13.639303                    | 0.2231146              | -13.860564                    | 0.2561627              | -13.518344                    | 0.4680387              | -12.025017                    |
| 180 | 0.3760799              | -12.566984                    | 0.1971598              | -14.166968                    | 0.3129086              | -13.022586                    | 0.1899975              | -14.258647                    | 0.2291255              | -13.7947                      | 0.1188809              | -15.420354                    |
| 190 | 0.4582279              | -12.077502                    | 0.3132541              | -13.019852                    | 0.1430624              | -14.961609                    | 0.0286954              | -18.941939                    | 0.2369787              | -13.711204                    | 0.1777455              | -14.423797                    |
| 200 | 0.3760799              | -12.566984                    | 0.2151002              | -13.951198                    | 0.02455                | -19.328502                    | 0.1236941              | -15.322019                    | 0.2291255              | -13.7947                      | 0.1805552              | -14.38494                     |

1. A. Eteba, M. Bassyouni and M. Saleh, *Energy Environ*, 2022, DOI: 10.1177/0958305X221130536, 0958305X221130536. <https://doi.org/10.1177/0958305X221130536>
